# Supplementary material
Source: PubMed Central journal article supplement (PMC5010873)

# **A multimodal imaging workflow to visualize metal mixtures in the human placenta and explore colocalization with biological response markers**

Megan M. Niedzwiecki<sup>1\*a</sup>, Christine Austin<sup>1,2</sup>, Romain Remark<sup>3</sup>, Miriam Merad<sup>3</sup>, Sacha Gnjatich<sup>3</sup>, Guadalupe Estrada-Gutierrez<sup>4</sup>, Aurora Espejel-Nuñez<sup>5</sup>, Hector Borboa-Olivares<sup>6</sup>, Mario Guzman-Huerta<sup>6</sup>, Rosalind J. Wright<sup>7</sup>, Robert O. Wright<sup>1</sup> and Manish Arora<sup>1\*</sup>

<sup>1</sup>Exposure Biology, Senator Frank R. Lautenberg Environmental Health Sciences Laboratory, Department of Preventive Medicine, Icahn School of Medicine at Mount Sinai, New York City, New York, USA

<sup>2</sup>Faculty of Dentistry, The University of Sydney, Sydney, New South Wales 2006, Australia

<sup>3</sup>Division of Hematology/Oncology and Immunology, The Tisch Cancer Institute, Icahn School of Medicine at Mount Sinai, New York City, New York, USA

<sup>4</sup>Biomedical Research Branch, Instituto Nacional de Perinatología, Mexico City, Mexico

<sup>5</sup>Department of Immunobiochemistry, Instituto Nacional de Perinatología, Mexico City, Mexico

<sup>6</sup>Maternal Fetal Research Unit, Instituto Nacional de Perinatología, Mexico City, Mexico

<sup>7</sup>Mindich Child Health & Development Institute, Icahn School of Medicine at Mount Sinai, New York, New York, USA

**a. Present address:** Rollins School of Public Health, Emory University, 1518 Clifton Road NE, Claudia Nance Rollins Building, 5th Floor, Atlanta, GA 30322.

# Supplementary Figure 1. Placenta sample 1, fetal side

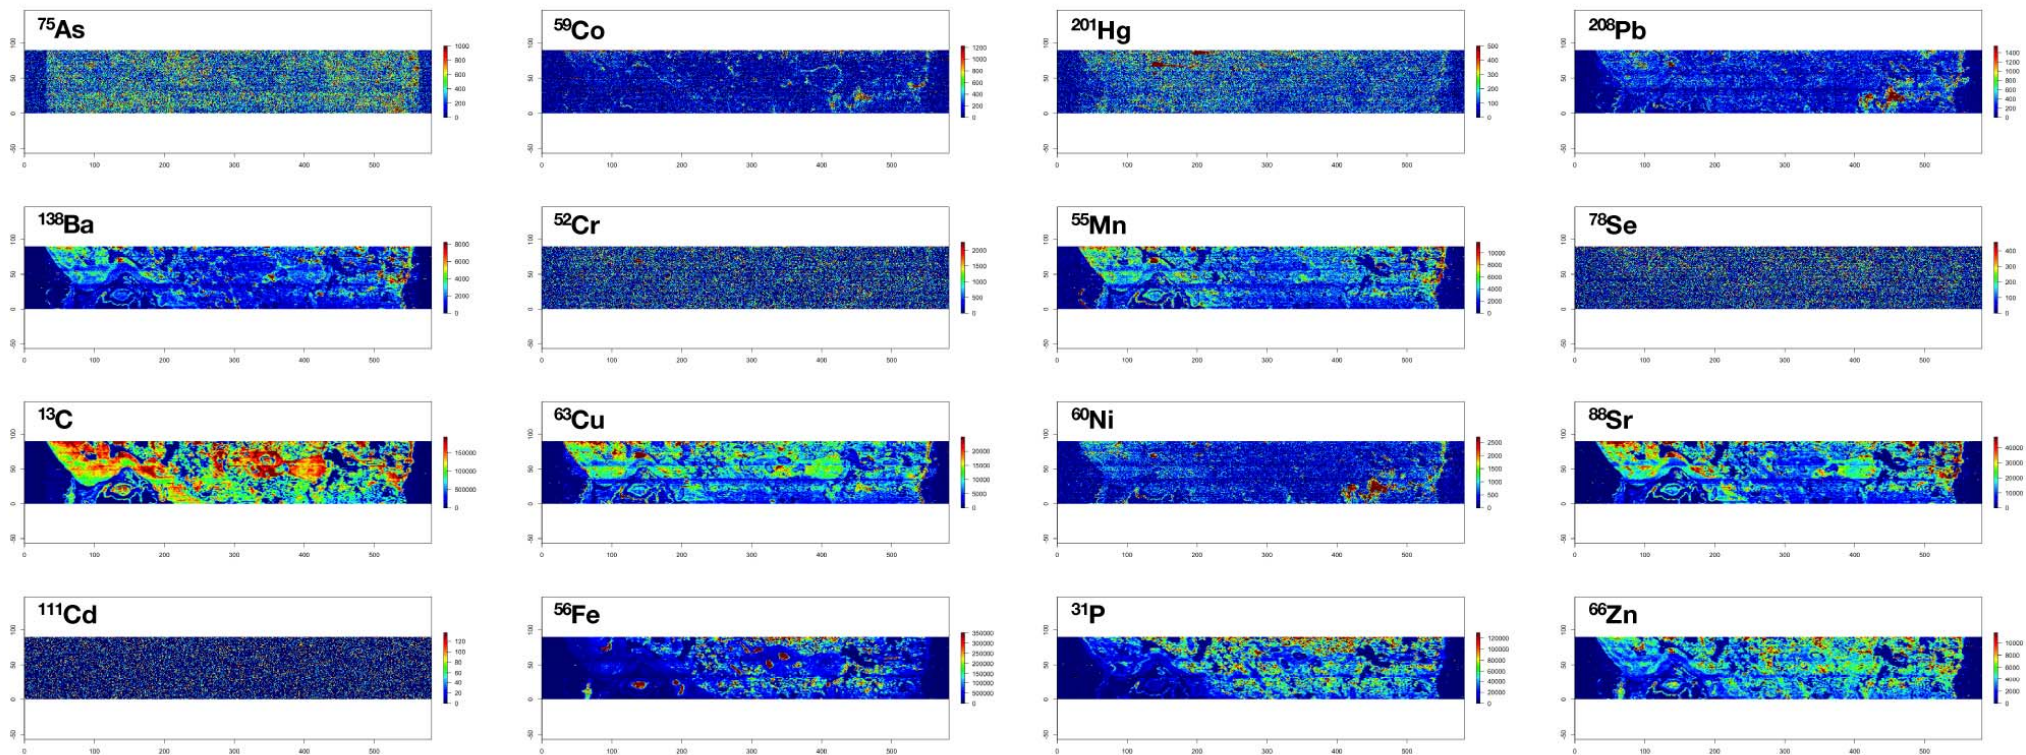

Mask

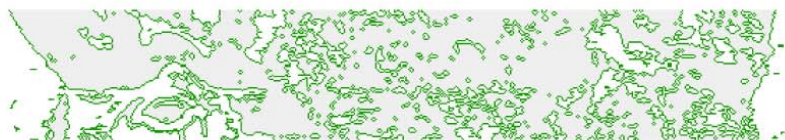

## Supplementary Figure 2. Placenta sample 1, maternal side

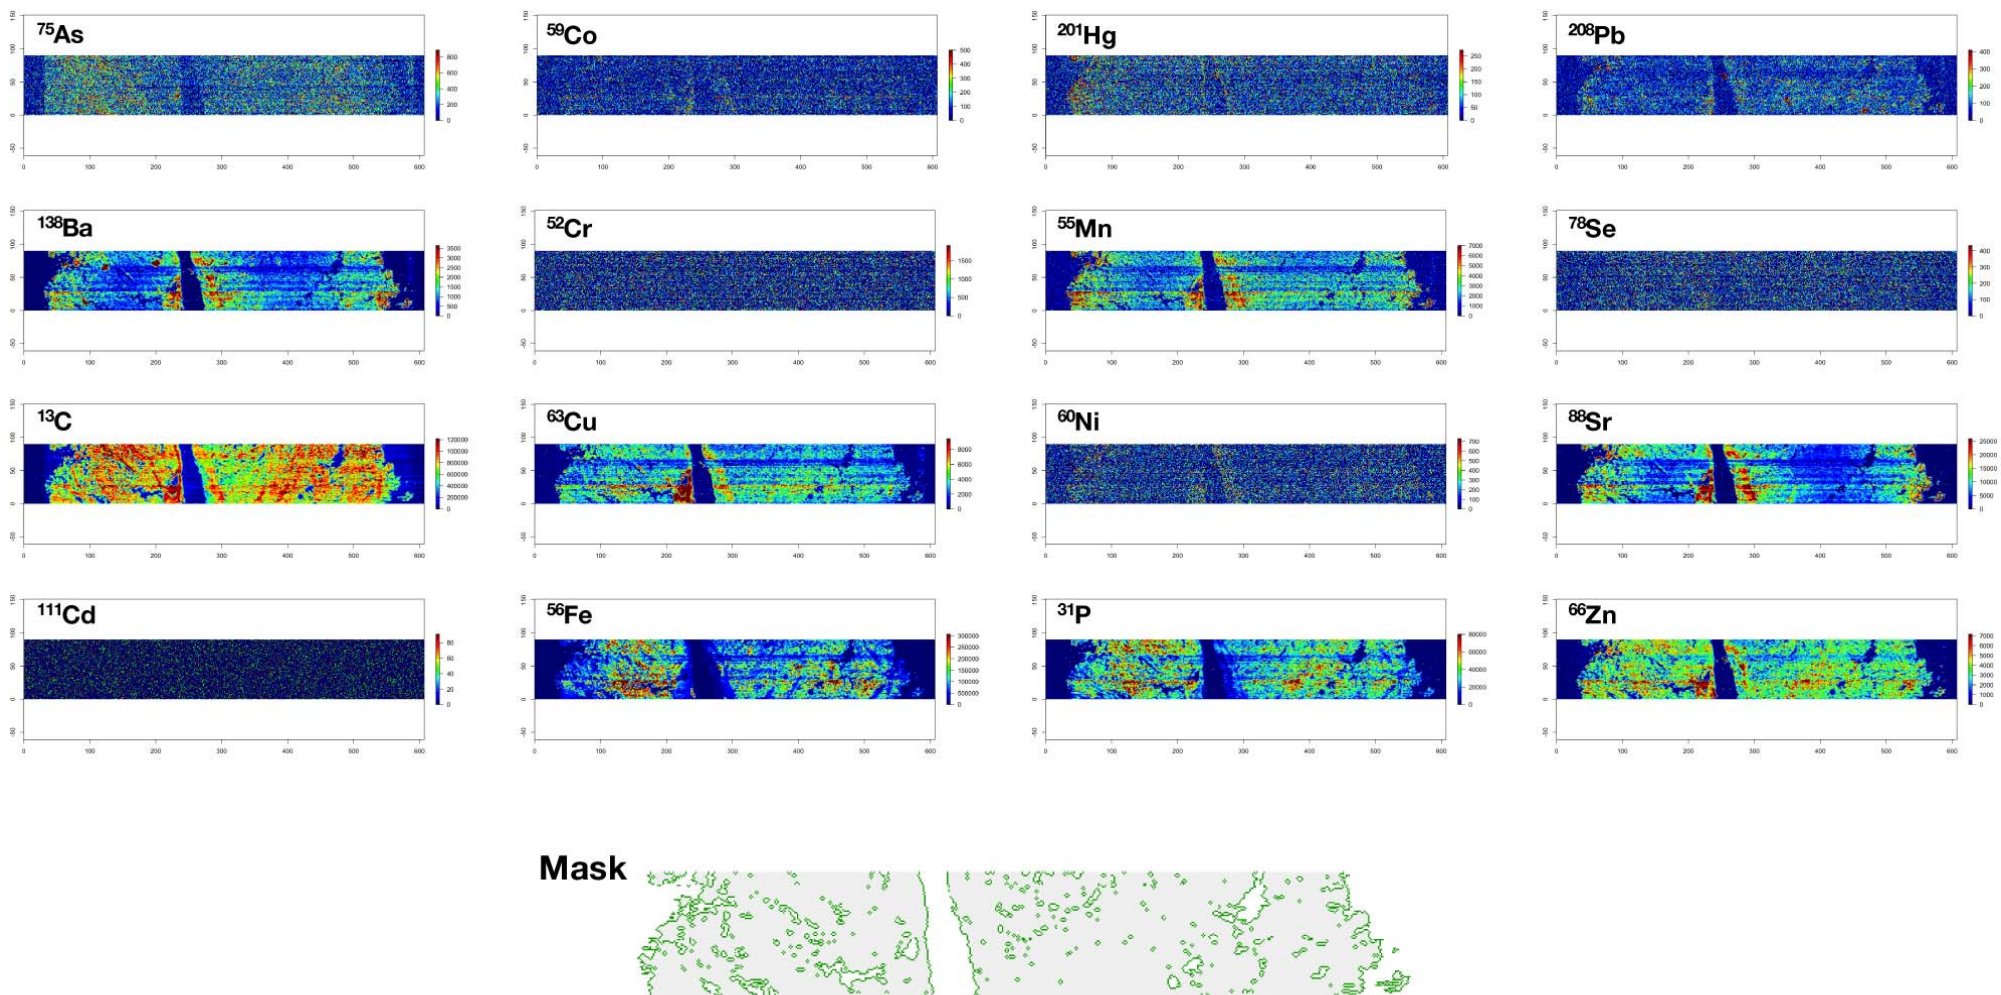

### Supplementary Figure 3. Placenta sample 2, fetal side

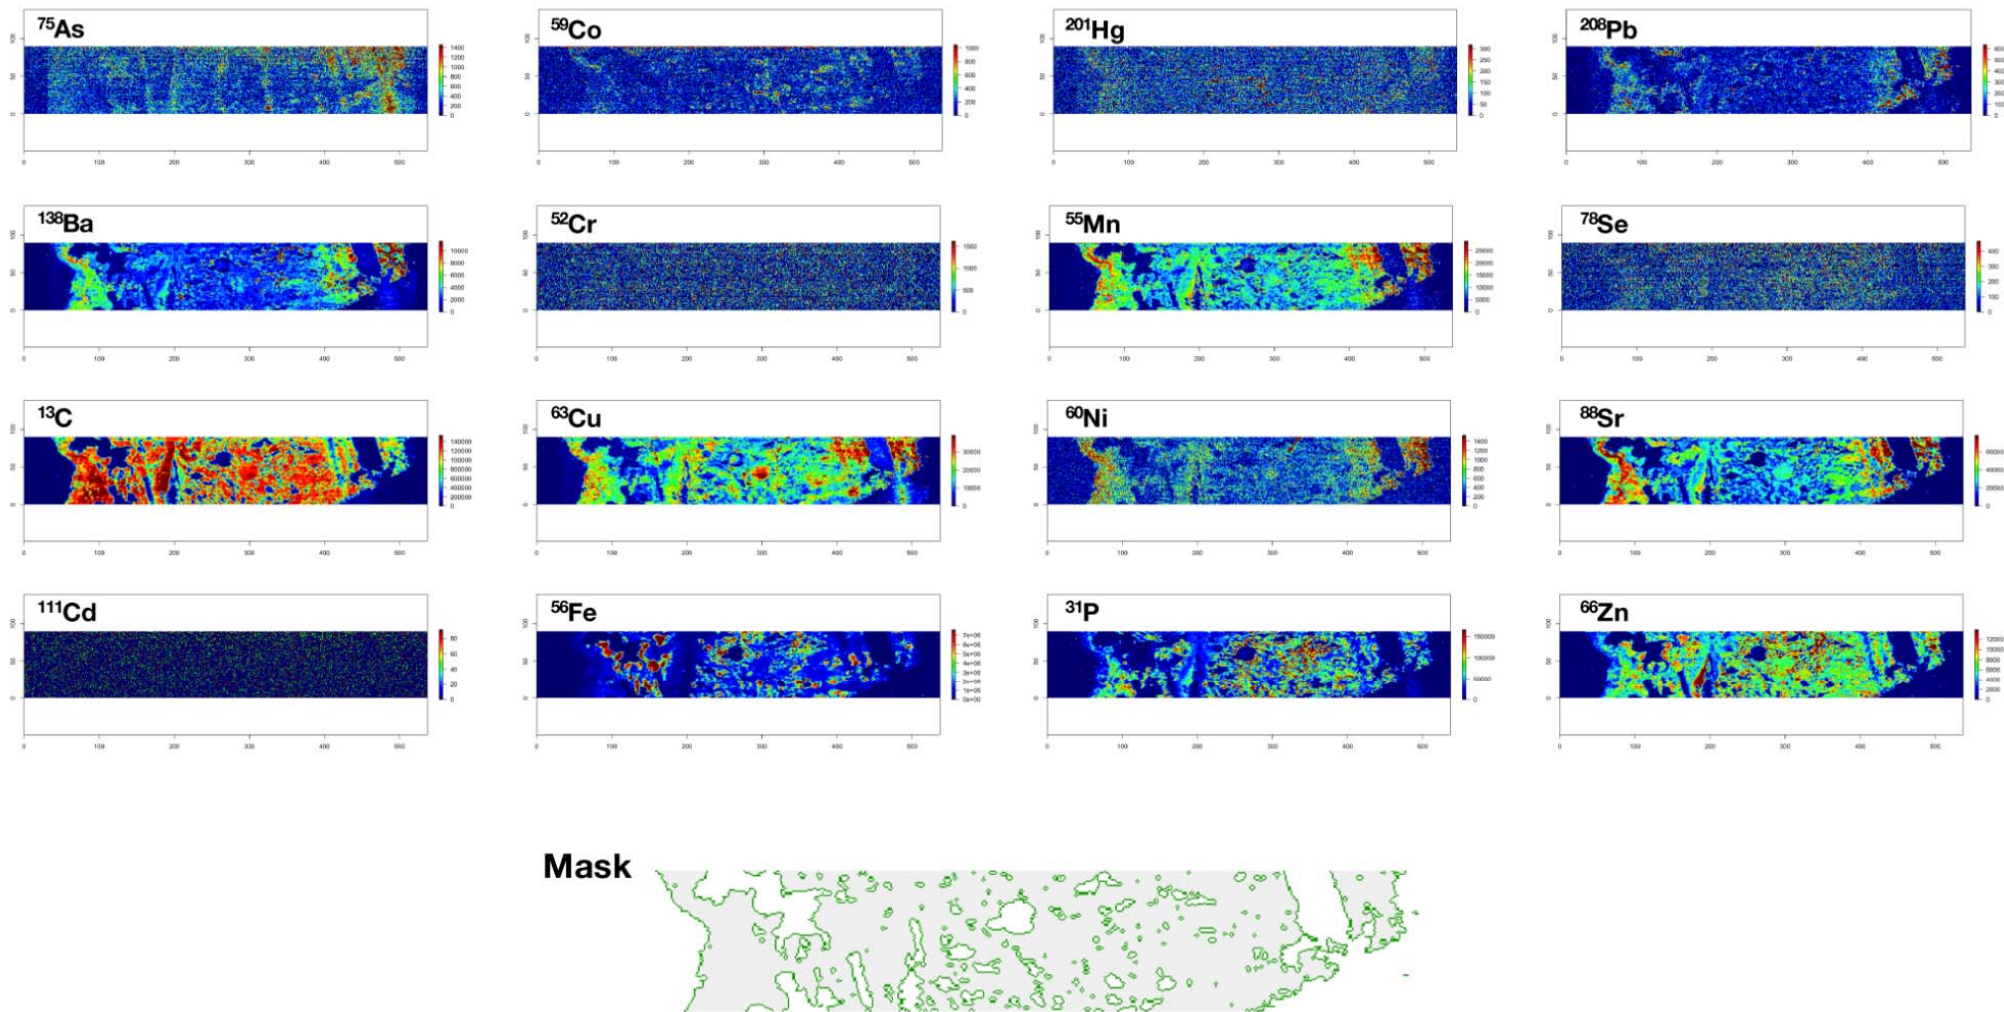

# Supplementary Figure 4. Placenta sample 2, maternal side

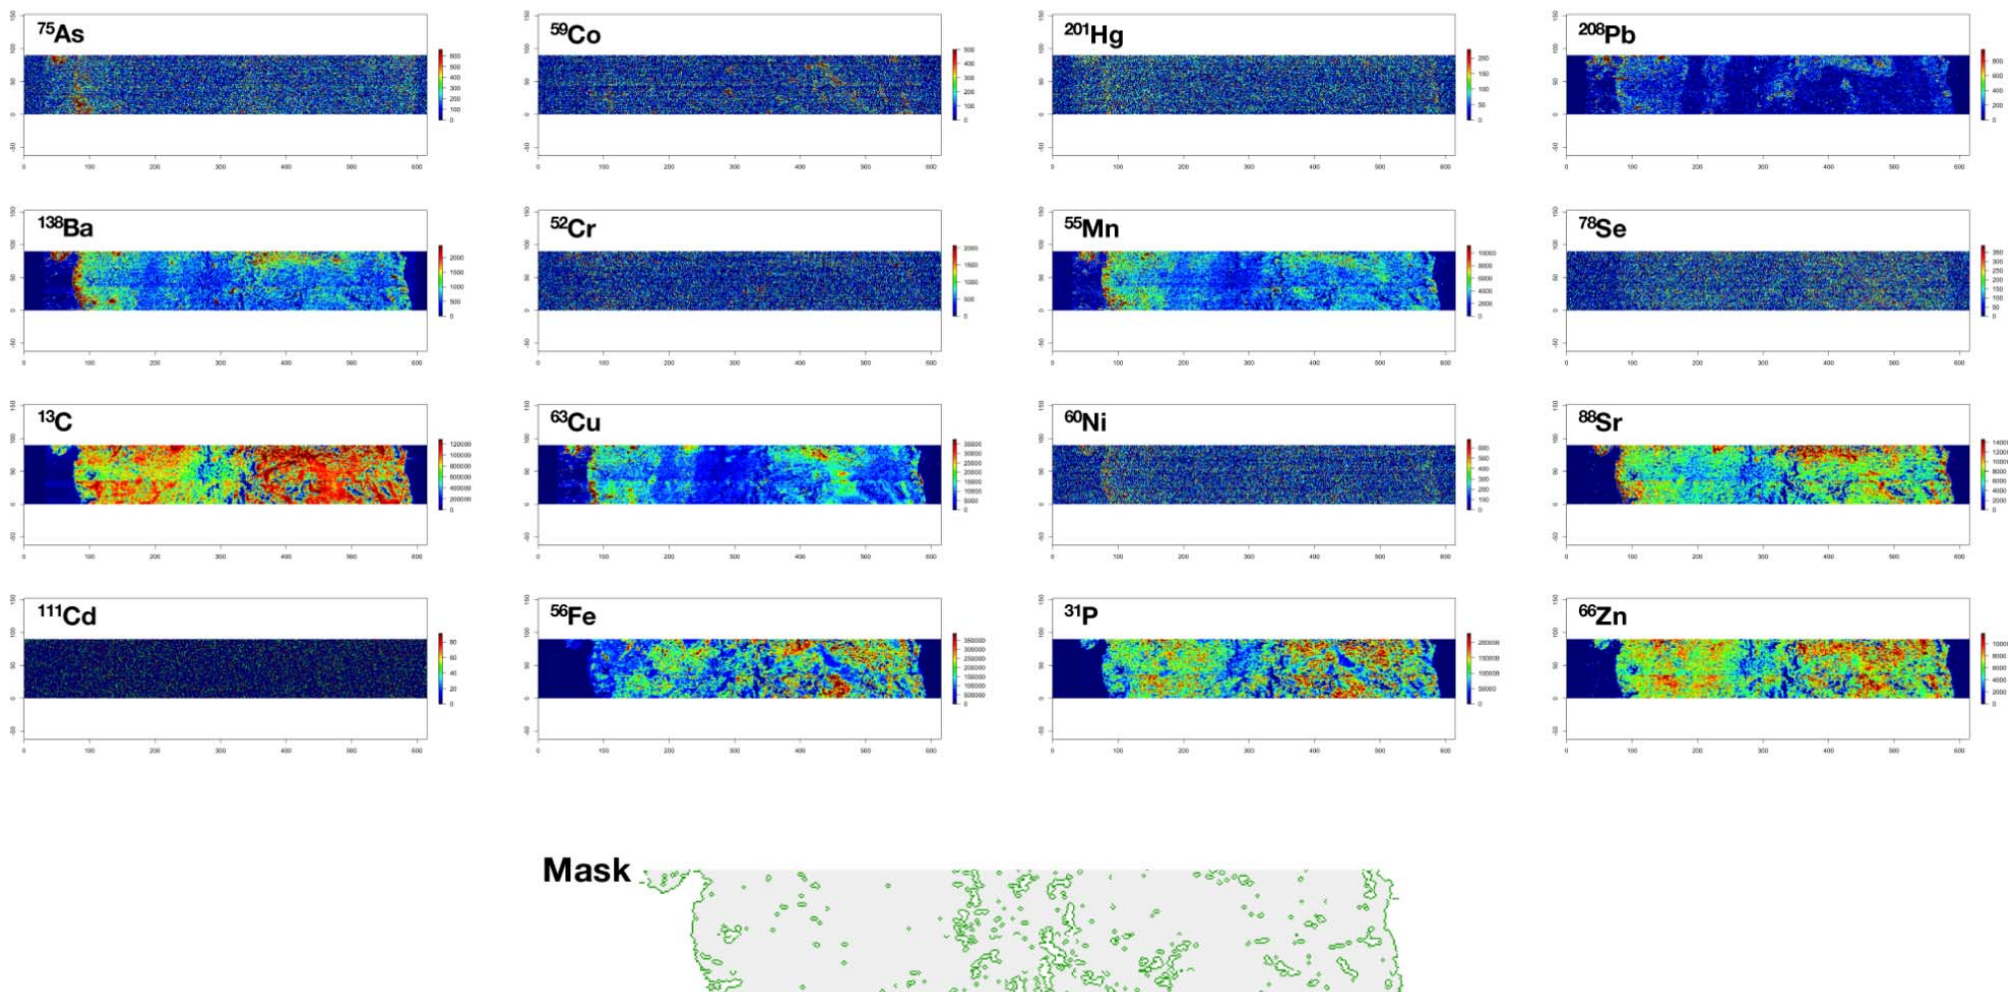

# Supplementary Figure 5. Placenta sample 3, fetal side

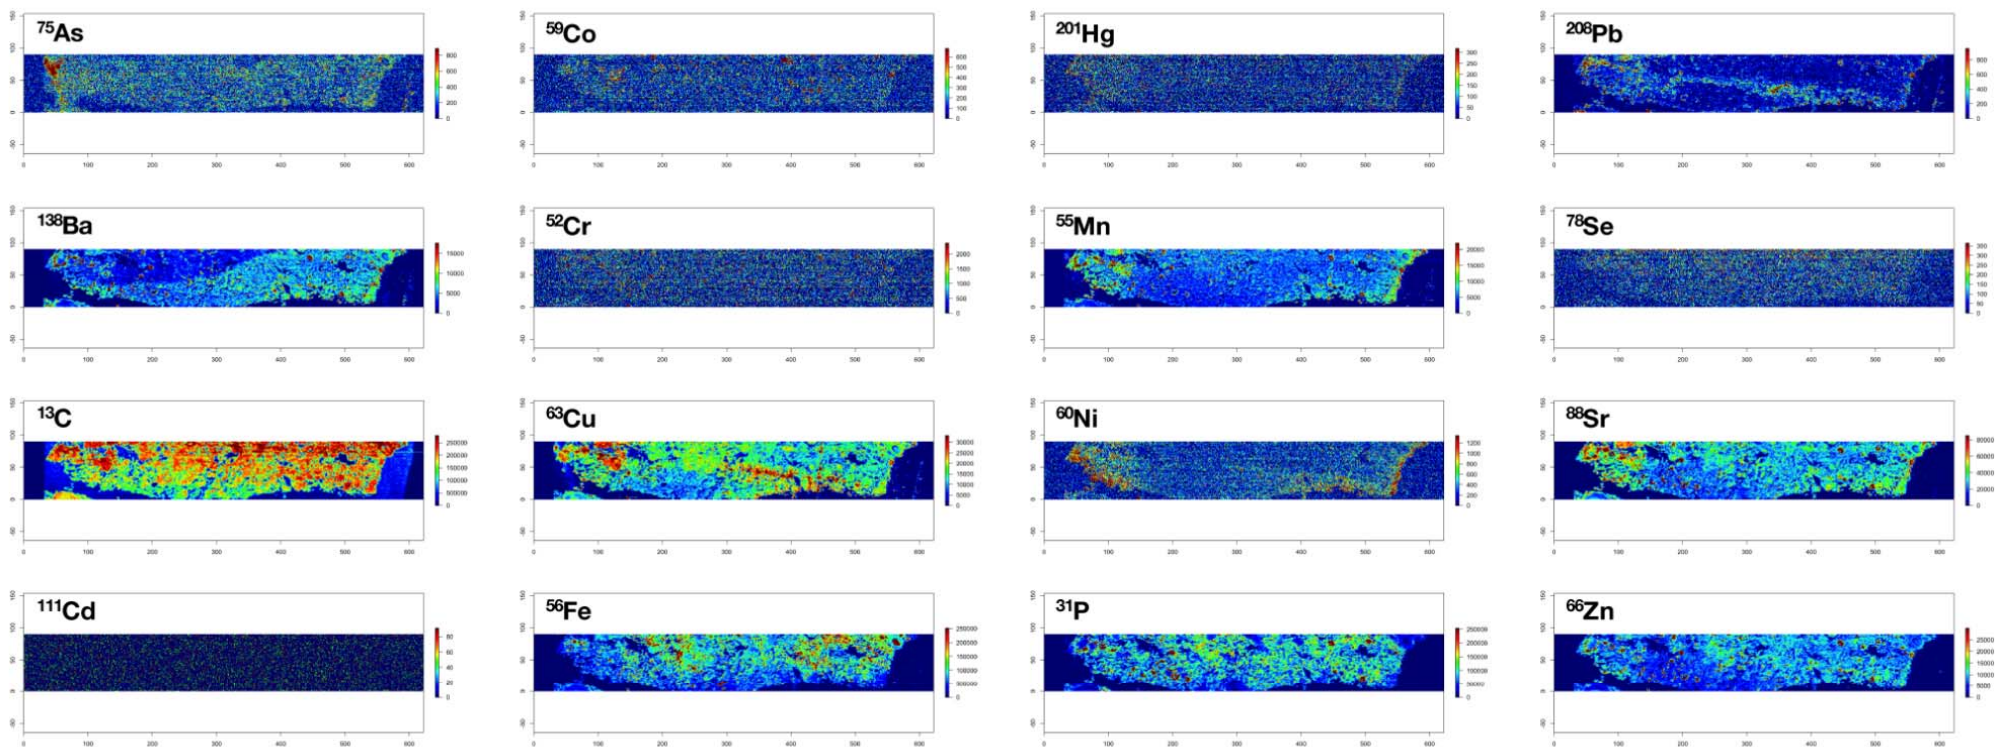

Mask

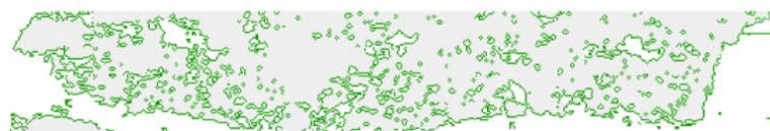

# Supplementary Figure 6. Placenta sample 3, maternal side

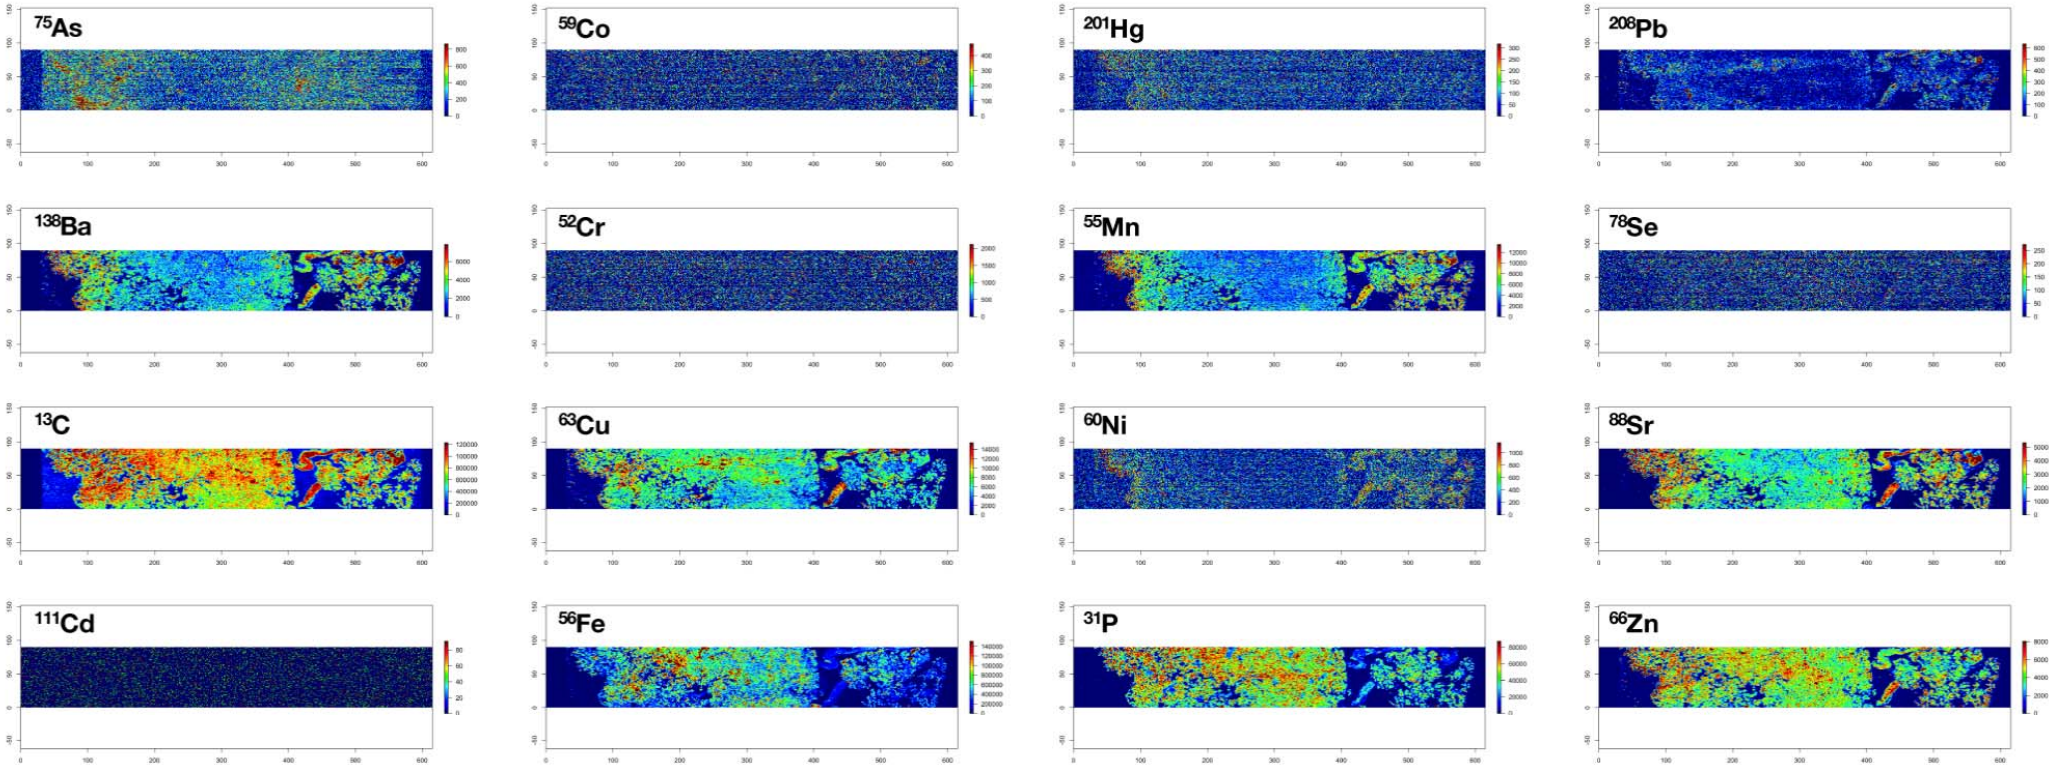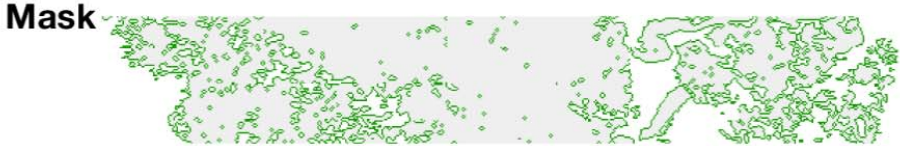

# Supplementary Figure 7. Placenta sample 4, fetal side

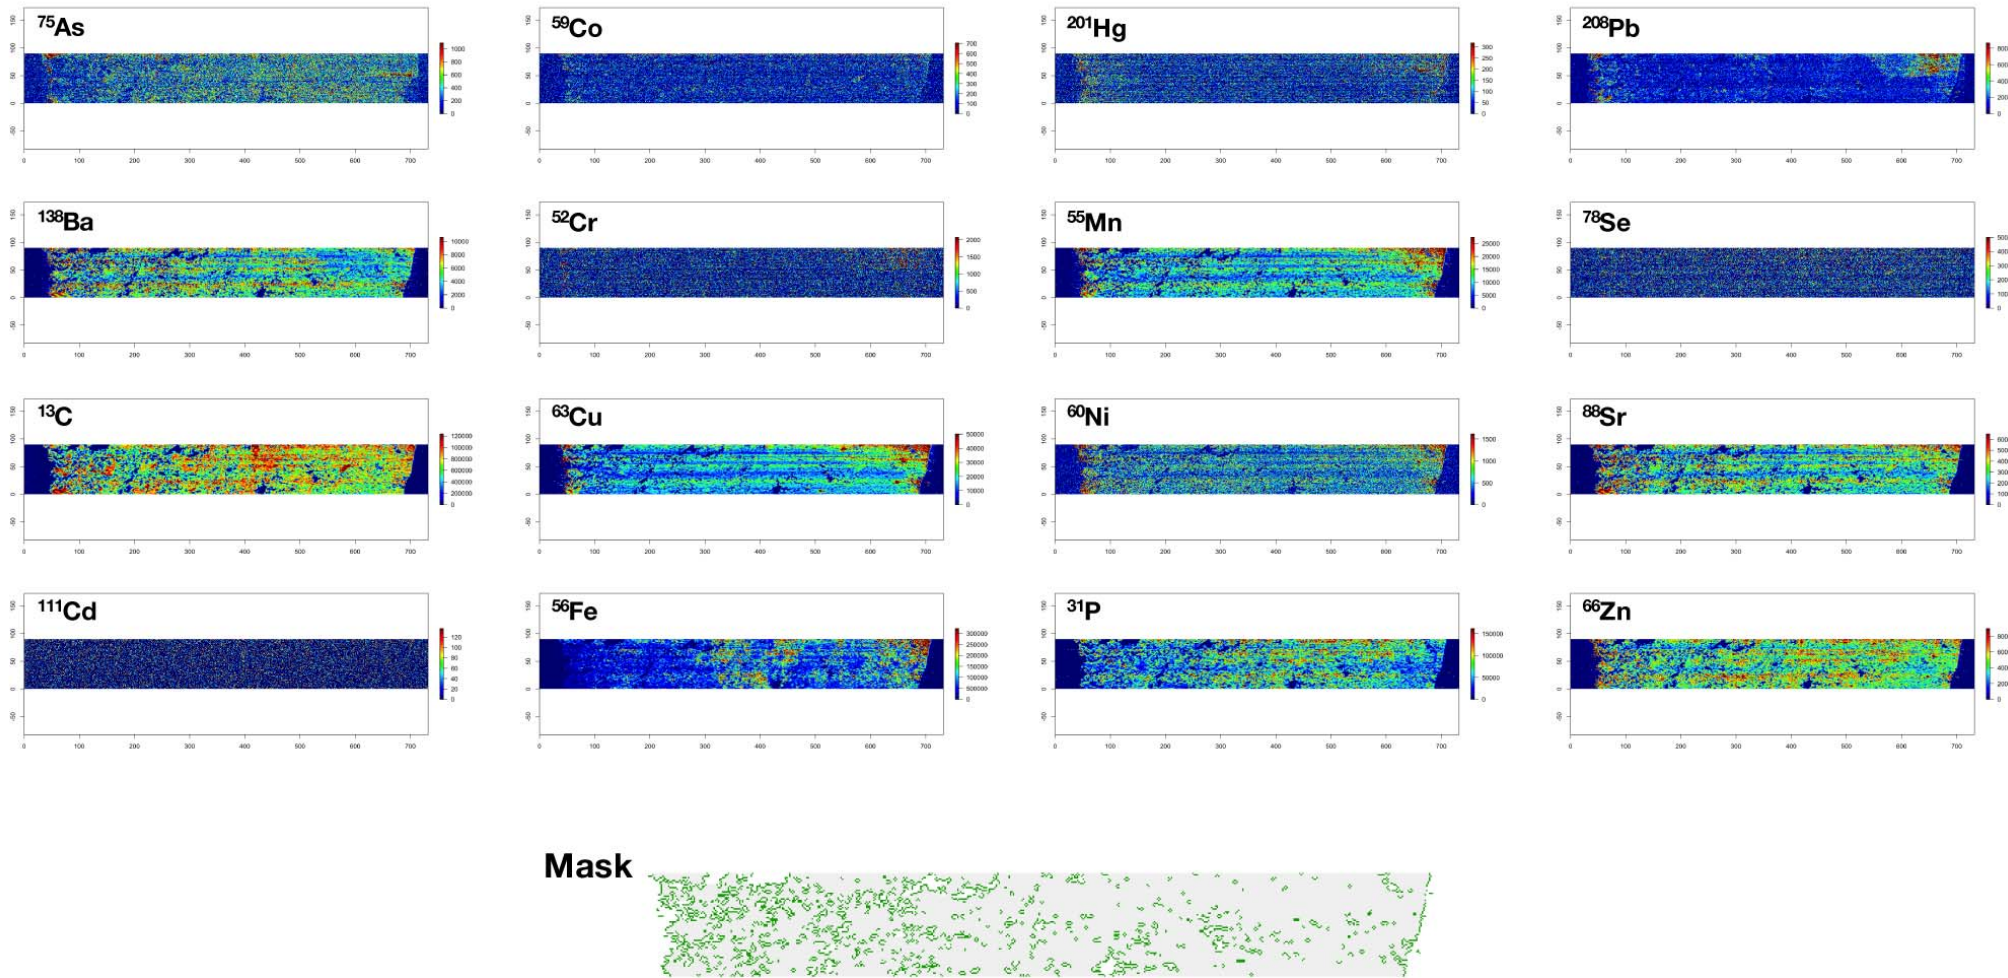



# Supplementary Figure 8. Placenta sample 4, maternal side

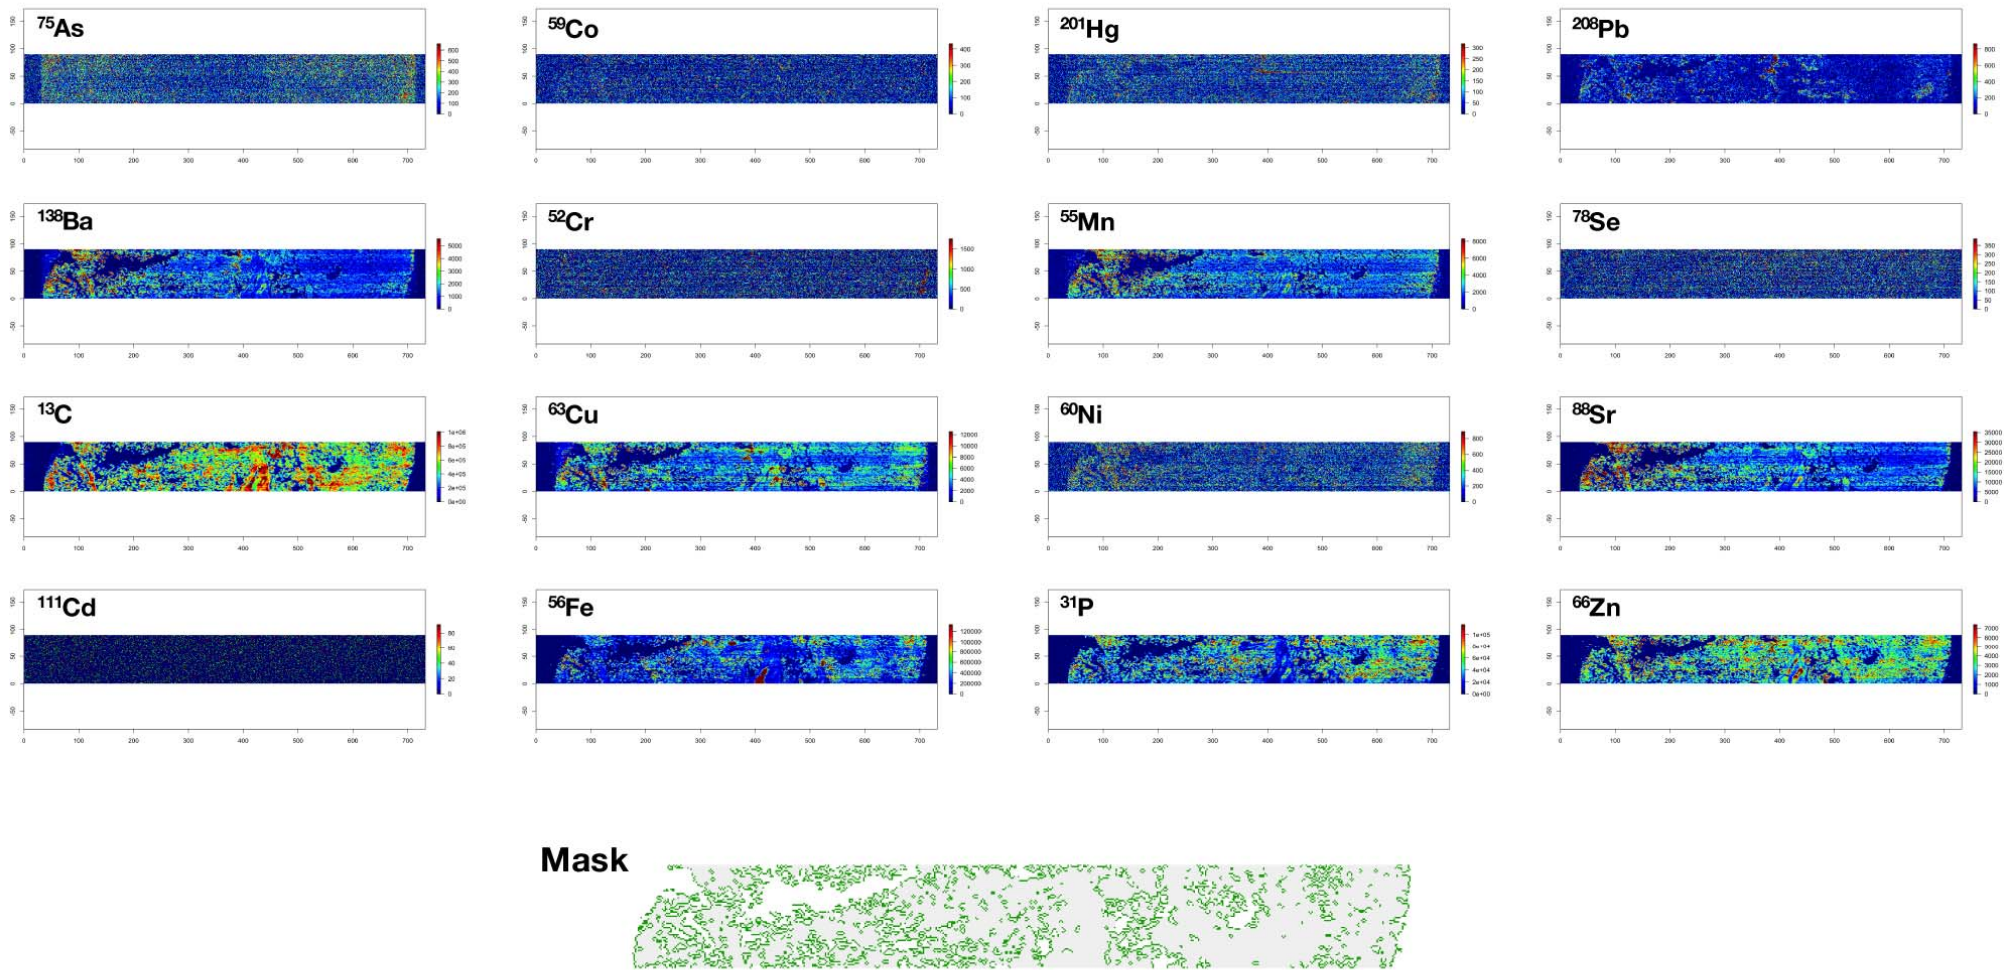

# Supplementary Figure 9. Placenta sample 5, fetal side

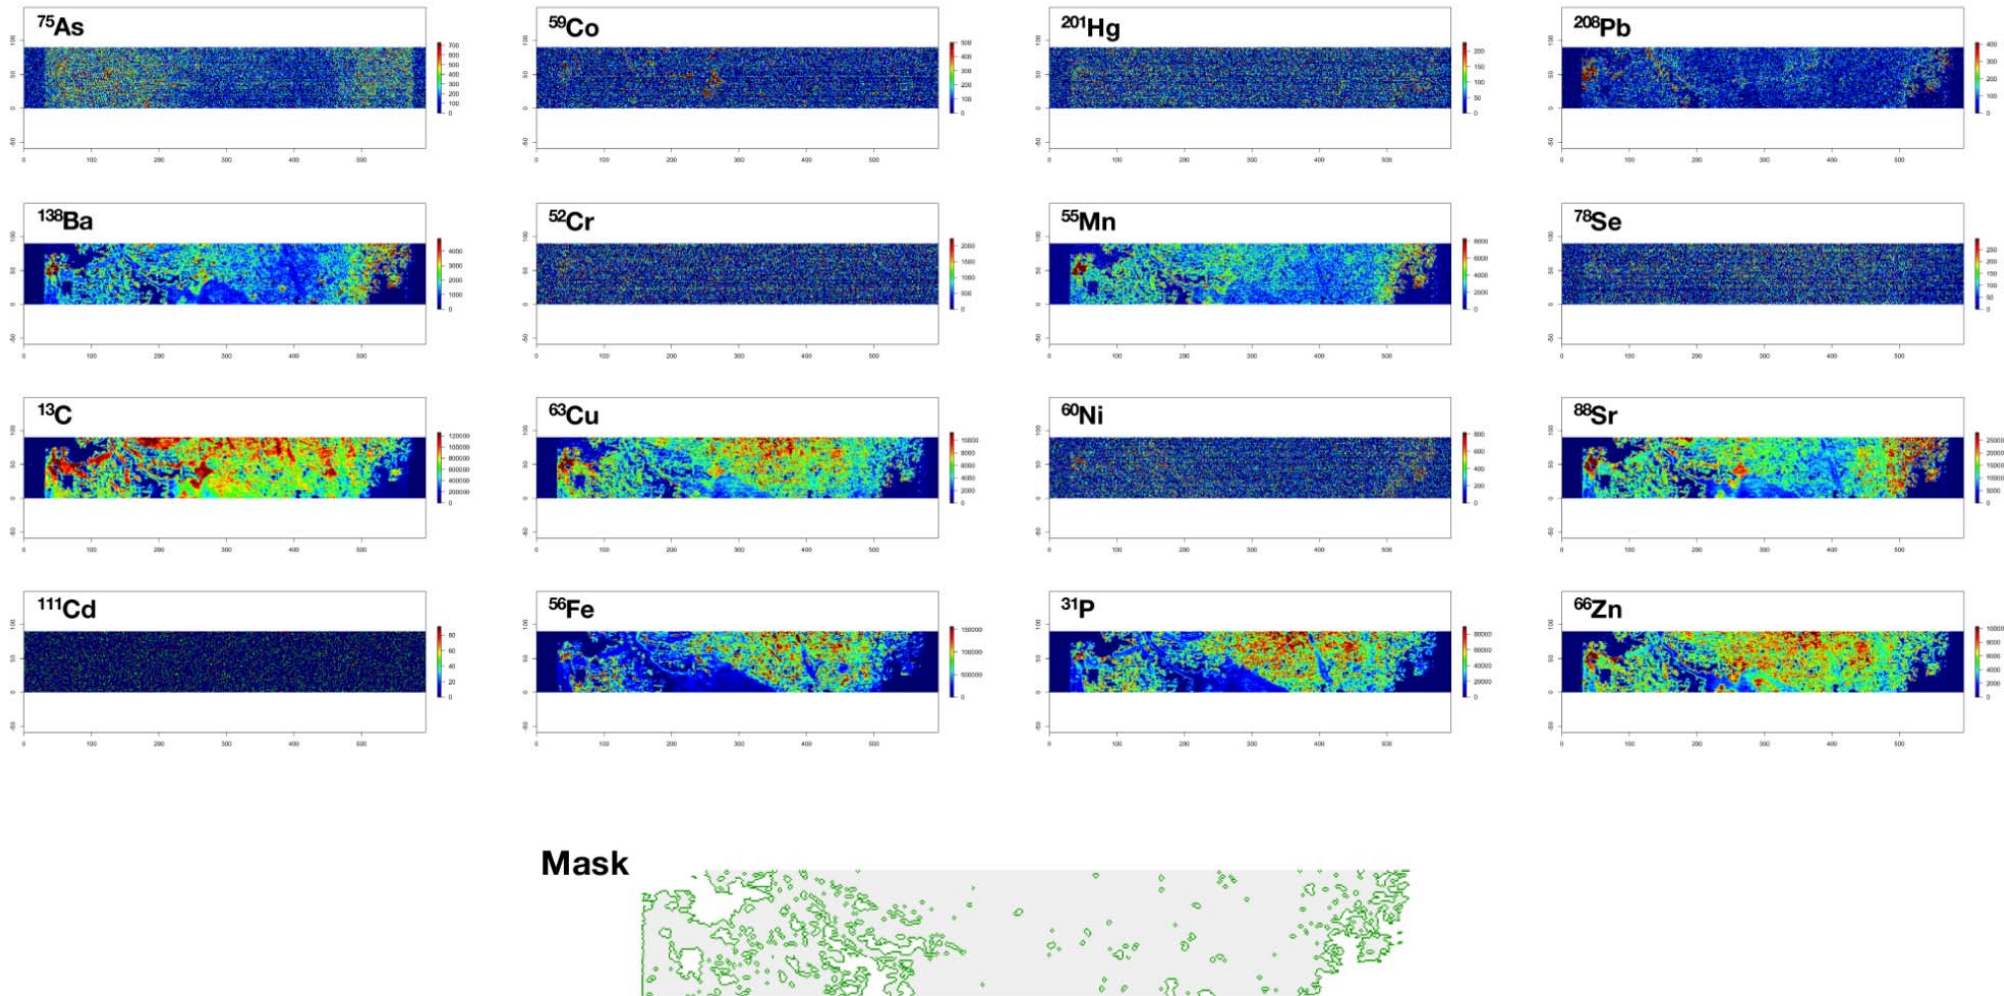

# Supplementary Figure 10. Placenta sample 5, maternal side

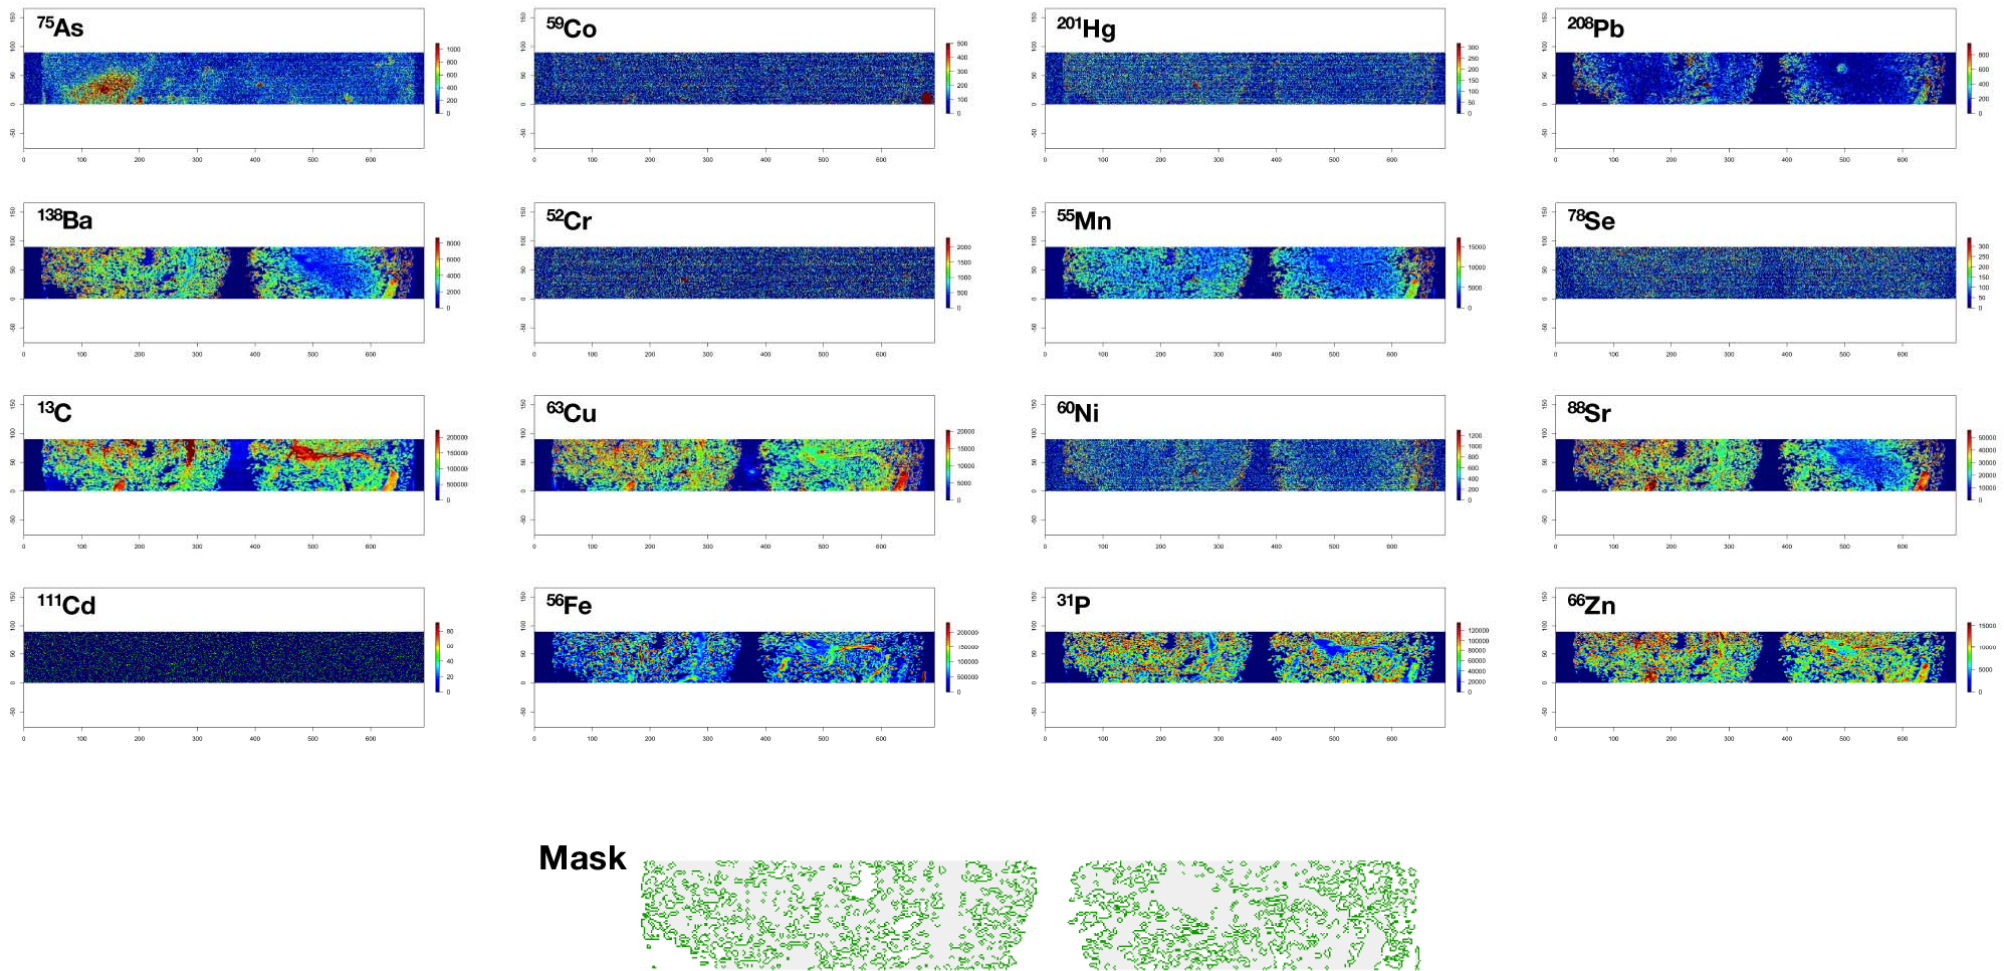

Supplement: NIHMS770871-supplement-ESI1.pdf [file NIHMS770871-supplement-ESI1.pdf]
